# Supplementary material
Source: Springer Nature journal article supplement (https://www.springermedizin.de/resource/supplementary/12963_2013_216_MOESM8_ESM.pdf/9572410)

Males, 2001

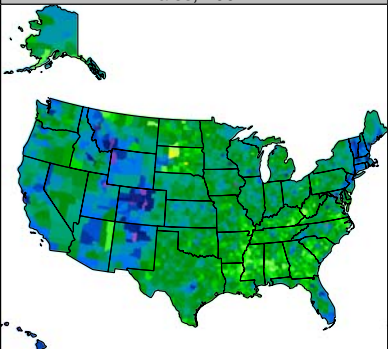

Males, 2009

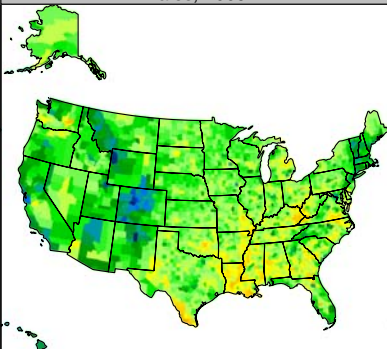

Males, 2011

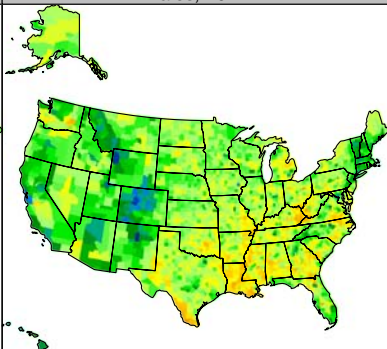

Females, 2001

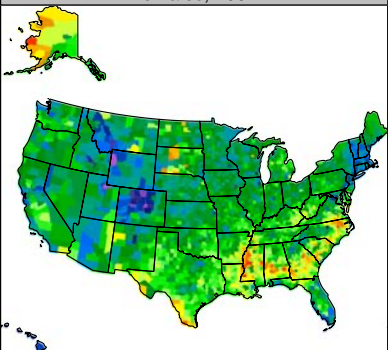

Females, 2009

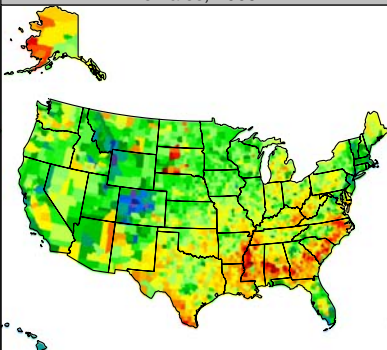

Females, 2011

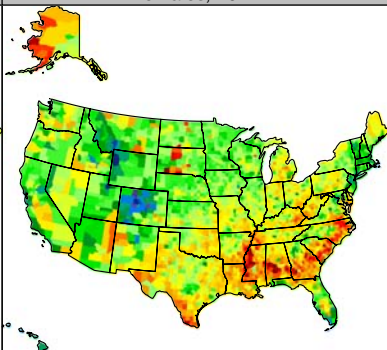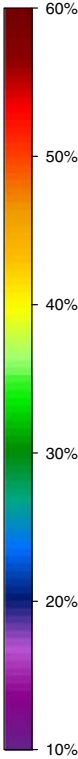

Supplement: MOESM8 [file 9572410]
